# Supplementary material
Source: Springer Nature journal article supplement (https://www.springermedizin.de/resource/supplementary/13058_2008_2220_MOESM4_ESM.pdf/9700920)

**Supplementary Figure 1C.** Expression of nuclear receptors and/or related genes increasing during HC11 differentiation (upper panel) and correlating changes in *in vivo* mammary glands (lower panel), respectively. Average of three independent cell cultures and differentiations; or 3-5 mice in each stage, respectively.

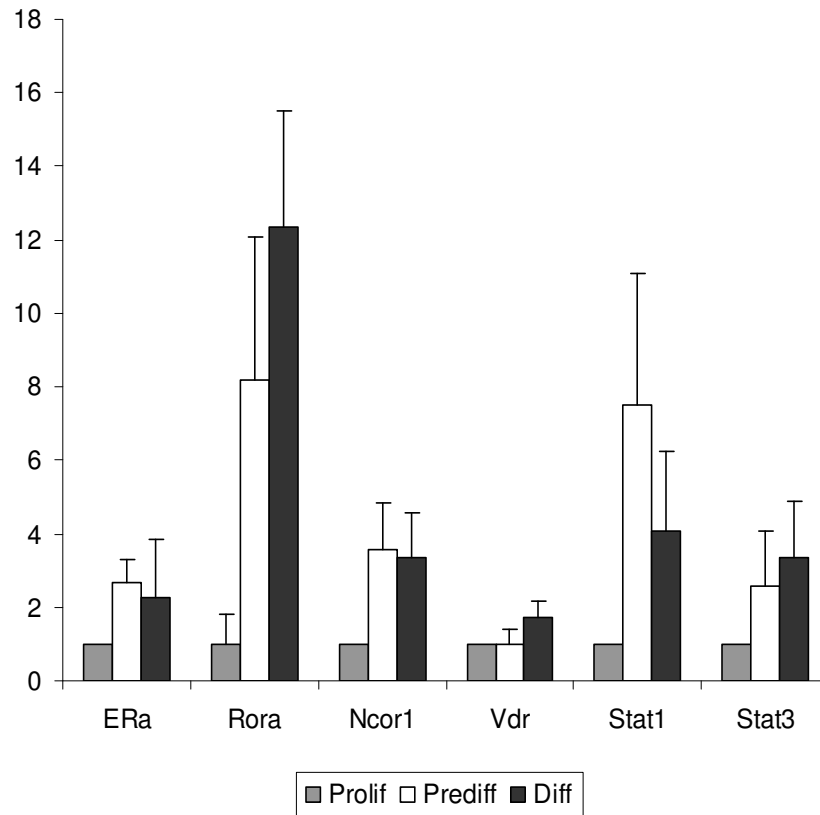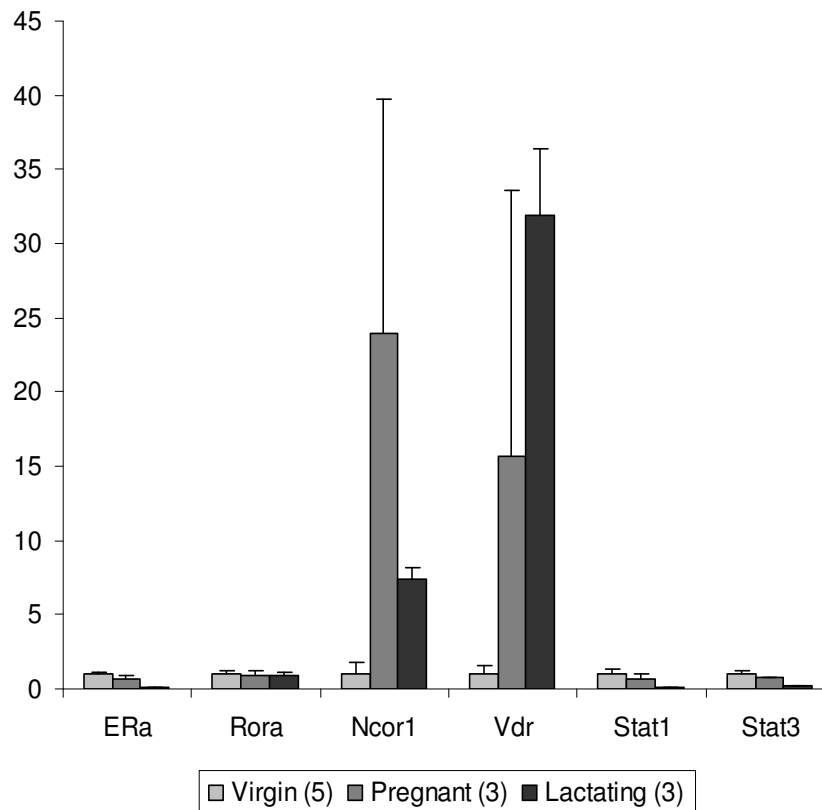

Supplement: MOESM4 [file 9700920]
